# Supplementary material
Source: PubMed Central journal article supplement (PMC8479579)
Supplement: jama-e2114986-s001.pdf [file jama-e2114986-s001.pdf]

## Supplemental Online Content

Hanley GE, Bickford C, Ip A, et al. Association of epidural analgesia during labor and delivery with autism spectrum disorder in offspring. *JAMA*. doi:10.1001/jama.2021.14986

**eTable.** Association between labor and delivery epidural analgesia use and risk of autism spectrum disorder in cohorts of uncomplicated deliveries and children with follow-up to at least age 6 years

This supplemental material has been provided by the authors to give readers additional information about their work.

**eTable.** Association between labor and delivery epidural analgesia use and risk of autism spectrum disorder in cohorts of uncomplicated deliveries and children with follow-up to at least age 6 years

| Cohort type                                                       | Epidural analgesia during labor and delivery |             | Absolute risk difference, % (95% CI) | Unadjusted hazard ratio (95% CI) | Adjusted HR (95%CI) <sup>a</sup> |                      |                      |
|-------------------------------------------------------------------|----------------------------------------------|-------------|--------------------------------------|----------------------------------|----------------------------------|----------------------|----------------------|
|                                                                   | Exposed                                      | Not exposed |                                      |                                  | Model 1 <sup>b</sup>             | Model 2 <sup>c</sup> | Model 3 <sup>d</sup> |
| Total N                                                           | 91 076                                       | 231 871     | 322 947                              | 322 947                          | 299 044                          | 299 038              | 299 033              |
| Uncomplicated deliveries <sup>e</sup>                             | 1307 (1.44)                                  | 2717 (1.17) | 0.26 (0.17, 0.35)                    | 1.32 (1.24, 1.41)                | 1.31 (1.21, 1.40)                | 1.12 (1.13, 1.21)    | 1.11 (1.03, 1.19)    |
| Total N                                                           | 74 679                                       | 200 390     | 275 069                              | 275 069                          | 252 536                          | 252 527              | 252 520              |
| Children who reached age 6 years by end of follow-up <sup>f</sup> | 1381 (1.85)                                  | 3069 (1.53) | 0.32 (0.21, 0.43)                    | 1.24 (1.16, 1.32)                | 1.23 (1.15, 1.31)                | 1.05 (0.98, 1.13)    | 1.03 (0.96, 1.11)    |

<sup>a</sup> Missing data for body mass index were imputed using multiple imputation. The missing data for other variables were not imputed and were assumed missing at random.

<sup>b</sup> Adjusted for year of birth, maternal and co-parent age, neighborhood income quintile, and community size.

<sup>c</sup> Adjusted for items in model 1 plus gestational diabetes, preexisting diabetes, pregnancy-induced hypertension, other hypertension, parity, smoking during pregnancy, and body mass index.

<sup>d</sup> Adjusted for items in models 1 and 2 plus induction of labor, gestational age, sex, small or large for gestational age, and congenital anomaly.

<sup>e</sup> Excludes infants born with a congenital anomaly, small for gestational age, large for gestational age, had an Apgar less than 7 at 5 minutes, or were admitted to the NICU. Adjusted hazard ratio three adjusts for items in model 1 and 2 plus induction of labour, gestational age, and sex.

<sup>f</sup> Median (IQR) follow-up time in years was 11.0 (8.4, 13.9).
